# Supplementary material for: Possible Alternatives: Identifying and Quantifying Adulteration in Buffalo, Goat, and Camel Milk Using Mid-Infrared Spectroscopy Combined with Modern Statistical Machine Learning Methods
Source: MDPI journal article supplement (doi:10.3390/foods12203856), 2023-10-21
Supplement: s1 [file s1]

Table S1 Performance of prediction models obtained in calibration set, for the discrimination of pure milk and adulterant (mixed with cow milk)

| Modeling <sup>1</sup> | Milk product <sup>2</sup> | Preprocessin g <sup>3</sup> | Calibration Metrics <sup>4</sup> |             |             |             |             |             |
|-----------------------|---------------------------|-----------------------------|----------------------------------|-------------|-------------|-------------|-------------|-------------|
|                       |                           |                             | AUC                              | Acc         | Sen         | Spe         | PPV         | NPV         |
| PLSDA                 | BM                        | None                        | 1.00                             | 0.98        | 0.99        | 0.97        | 0.97        | 0.99        |
|                       |                           | <b>1D</b>                   | <b>1.00</b>                      | <b>1.00</b> | <b>1.00</b> | <b>0.99</b> | <b>0.99</b> | <b>1.00</b> |
|                       |                           | <b>2D</b>                   | <b>1.00</b>                      | <b>1.00</b> | <b>1.00</b> | <b>0.99</b> | <b>0.99</b> | <b>1.00</b> |
|                       |                           | SNV                         | 1.00                             | 0.99        | 0.99        | 0.99        | 0.99        | 0.99        |
|                       |                           | SG                          | 1.00                             | 0.98        | 1           | 0.96        | 0.97        | 1.00        |
|                       | CM                        | None                        | 1.00                             | 1.00        | 0.99        | 1.00        | 1.00        | 0.99        |
|                       |                           | 1D                          | 1.00                             | 1.00        | 0.99        | 1.00        | 1.00        | 0.99        |
|                       |                           | <b>2D</b>                   | <b>1.00</b>                      | <b>0.99</b> | <b>0.98</b> | <b>1.00</b> | <b>1.00</b> | <b>0.96</b> |
|                       |                           | SNV                         | 1.00                             | 1.00        | 0.99        | 1.00        | 1.00        | 0.99        |
|                       |                           | SG                          | 1.00                             | 0.99        | 0.99        | 1.00        | 1.00        | 0.97        |
|                       | GM                        | None                        | 1.00                             | 1.00        | 1.00        | 1.00        | 1.00        | 1.00        |
|                       |                           | 1D                          | 1.00                             | 1.00        | 1.00        | 1.00        | 1.00        | 1.00        |
|                       |                           | <b>2D</b>                   | <b>1.00</b>                      | <b>0.99</b> | <b>0.98</b> | <b>1.00</b> | <b>1.00</b> | <b>0.97</b> |
|                       |                           | SNV                         | 1.00                             | 1.00        | 1.00        | 1.00        | 1.00        | 1.00        |
|                       |                           | SG                          | 1.00                             | 1.00        | 1.00        | 1.00        | 1.00        | 1.00        |
| LSVM                  | BM                        | None                        | 1.00                             | 0.99        | 0.99        | 0.98        | 0.98        | 0.99        |
|                       |                           | <b>1D</b>                   | <b>1.00</b>                      | <b>1.00</b> | <b>1.00</b> | <b>0.99</b> | <b>0.99</b> | <b>1.00</b> |
|                       |                           | 2D                          | 1.00                             | 1.00        | 1.00        | 0.99        | 0.99        | 1.00        |
|                       |                           | SNV                         | 1.00                             | 1.00        | 1.00        | 0.99        | 0.99        | 1.00        |
|                       |                           | SG                          | 1.00                             | 0.99        | 0.99        | 0.99        | 0.99        | 0.99        |
|                       | CM                        | None                        | 1.00                             | 1.00        | 1.00        | 1.00        | 1.00        | 1.00        |
|                       |                           | <b>1D</b>                   | <b>1.00</b>                      | <b>1.00</b> | <b>1.00</b> | <b>1.00</b> | <b>1.00</b> | <b>1.00</b> |
|                       |                           | <b>2D</b>                   | <b>1.00</b>                      | <b>1.00</b> | <b>1.00</b> | <b>1.00</b> | <b>1.00</b> | <b>1.00</b> |
|                       |                           | SNV                         | 1.00                             | 0.99        | 0.99        | 1.00        | 1.00        | 0.99        |
|                       |                           | SG                          | 1.00                             | 1.00        | 1.00        | 1.00        | 1.00        | 1.00        |
|                       | GM                        | None                        | 1.00                             | 0.99        | 0.98        | 1.00        | 1.00        | 0.97        |
|                       |                           | <b>1D</b>                   | <b>1.00</b>                      | <b>1.00</b> | <b>1.00</b> | <b>1.00</b> | <b>1.00</b> | <b>1.00</b> |
|                       |                           | 2D                          | 1.00                             | 0.98        | 0.97        | 1.00        | 1.00        | 0.94        |
|                       |                           | SNV                         | 0.98                             | 0.95        | 0.95        | 0.94        | 0.97        | 0.91        |
|                       |                           | SG                          | 0.99                             | 0.98        | 0.97        | 1.00        | 1.00        | 0.94        |
| RSVM                  | BM                        | None                        | 0.98                             | 0.94        | 0.93        | 0.94        | 0.95        | 0.93        |
|                       |                           | 1D                          | 1.00                             | 0.98        | 0.98        | 0.97        | 0.98        | 0.98        |
|                       |                           | <b>2D</b>                   | <b>1.00</b>                      | <b>0.99</b> | <b>0.99</b> | <b>0.99</b> | <b>0.99</b> | <b>0.99</b> |
|                       |                           | SNV                         | 1.00                             | 1.00        | 1.00        | 1.00        | 1.00        | 1.00        |
|                       |                           | SG                          | 0.98                             | 0.93        | 0.92        | 0.94        | 0.95        | 0.91        |
|                       | CM                        | <b>None</b>                 | <b>1.00</b>                      | <b>1.00</b> | <b>1.00</b> | <b>1.00</b> | <b>1.00</b> | <b>1.00</b> |
|                       |                           | <b>1D</b>                   | <b>1.00</b>                      | <b>1.00</b> | <b>1.00</b> | <b>1.00</b> | <b>1.00</b> | <b>1.00</b> |
|                       |                           | <b>2D</b>                   | <b>1.00</b>                      | <b>1.00</b> | <b>1.00</b> | <b>1.00</b> | <b>1.00</b> | <b>1.00</b> |
|                       |                           |                             |                                  |             |             |             |             |             |

| Model <sup>in</sup><br>g <sup>1</sup> | Milk<br>product <sup>2</sup> | Preprocessing <sup>3</sup> | Validation Metrics <sup>4</sup> |      |      |      |      |      |
|---------------------------------------|------------------------------|----------------------------|---------------------------------|------|------|------|------|------|
|                                       |                              |                            | AUC                             | Acc  | Sen  | Spe  | PPV  | NPV  |
| PLSDA                                 | BM                           | None                       | 1.00                            | 1.00 | 1.00 | 1.00 | 1.00 | 1.00 |
|                                       |                              | 1D                         | 1.00                            | 1.00 | 1.00 | 1.00 | 1.00 | 1.00 |
|                                       |                              | 2D                         | 1.00                            | 1.00 | 1.00 | 1.00 | 1.00 | 1.00 |
|                                       |                              | SNV                        | 1.00                            | 1.00 | 1.00 | 1.00 | 1.00 | 1.00 |
|                                       |                              | SG                         | 1.00                            | 1.00 | 1.00 | 1.00 | 1.00 | 1.00 |
|                                       | CM                           | None                       | 1.00                            | 0.96 | 0.94 | 1.00 | 1.00 | 0.91 |
|                                       |                              | 1D                         | 1.00                            | 0.98 | 0.97 | 1.00 | 1.00 | 0.95 |
|                                       |                              | 2D                         | 1.00                            | 1.00 | 1.00 | 1.00 | 1.00 | 1.00 |
|                                       |                              | SNV                        | 1.00                            | 0.98 | 0.97 | 1.00 | 1.00 | 0.95 |
|                                       |                              | SG                         | 1.00                            | 0.98 | 0.97 | 1.00 | 1.00 | 0.95 |
|                                       | GM                           | None                       | 0.87                            | 0.96 | 1.00 | 0.86 | 0.94 | 1.00 |
|                                       |                              | 1D                         | 0.94                            | 0.96 | 1.00 | 0.86 | 0.94 | 1.00 |
|                                       |                              | 2D                         | 0.99                            | 0.96 | 0.94 | 1.00 | 1.00 | 0.86 |
|                                       |                              | SNV                        | 0.95                            | 0.92 | 0.94 | 0.86 | 0.94 | 0.86 |
|                                       |                              | SG                         | 0.95                            | 0.96 | 1.00 | 0.86 | 0.94 | 1.00 |
| LSVM                                  | BM                           | None                       | 1.00                            | 0.98 | 1.00 | 0.95 | 0.96 | 1.00 |
|                                       |                              | 1D                         | 1.00                            | 1.00 | 1.00 | 1.00 | 1.00 | 1.00 |
|                                       |                              | 2D                         | 1.00                            | 0.99 | 0.98 | 1.00 | 1.00 | 0.98 |
|                                       |                              | SNV                        | 1.00                            | 0.99 | 1.00 | 0.98 | 0.98 | 1.00 |
|                                       |                              | SG                         | 1.00                            | 0.98 | 1.00 | 0.95 | 0.96 | 1.00 |
|                                       | CM                           | None                       | 1.00                            | 0.98 | 1.00 | 0.95 | 0.97 | 1.00 |
|                                       |                              | 1D                         | 1.00                            | 1.00 | 1.00 | 1.00 | 1.00 | 1.00 |



|      |    |      |      |      |      |      |      |      |
|------|----|------|------|------|------|------|------|------|
| LSVM | GM | 2D   | 1.00 | 1.00 | 1.00 | 1.00 | 1.00 | 1.00 |
|      |    | SNV  | 1.00 | 1.00 | 1.00 | 1.00 | 1.00 | 1.00 |
|      |    | SG   | 1.00 | 1.00 | 1.00 | 1.00 | 1.00 | 1.00 |
|      |    | None | 1.00 | 1.00 | 1.00 | 1.00 | 1.00 | 1.00 |
|      |    | 1D   | 1.00 | 1.00 | 1.00 | 1.00 | 1.00 | 1.00 |
|      |    | 2D   | 1.00 | 1.00 | 1.00 | 1.00 | 1.00 | 1.00 |
|      | BM | SNV  | 1.00 | 0.97 | 0.95 | 1.00 | 1.00 | 0.94 |
|      |    | SG   | 1.00 | 1.00 | 1.00 | 1.00 | 1.00 | 1.00 |
|      |    | None | 1.00 | 0.99 | 1.00 | 0.98 | 0.99 | 0.99 |
|      |    | 1D   | 1.00 | 1.00 | 1.00 | 0.99 | 0.99 | 1.00 |
|      |    | 2D   | 1.00 | 1.00 | 1.00 | 0.99 | 0.99 | 1.00 |
|      |    | SNV  | 1.00 | 1.00 | 1.00 | 0.99 | 0.99 | 0.99 |
|      | CM | SG   | 1.00 | 0.99 | 0.99 | 0.99 | 0.99 | 0.98 |
|      |    | None | 1.00 | 1.00 | 1.00 | 1.00 | 1.00 | 1.00 |
|      |    | 1D   | 1.00 | 1.00 | 1.00 | 1.00 | 1.00 | 1.00 |
|      |    | 2D   | 1.00 | 1.00 | 1.00 | 1.00 | 1.00 | 1.00 |
|      |    | SNV  | 1.00 | 1.00 | 1.00 | 1.00 | 1.00 | 1.00 |
|      |    | SG   | 1.00 | 1.00 | 1.00 | 1.00 | 1.00 | 1.00 |
|      | GM | None | 1.00 | 0.97 | 0.95 | 1.00 | 1.00 | 0.94 |
|      |    | 1D   | 0.97 | 0.97 | 0.95 | 1.00 | 1.00 | 0.94 |
|      |    | 2D   | 0.96 | 0.97 | 0.95 | 1.00 | 1.00 | 0.94 |
|      |    | SNV  | 1.00 | 0.99 | 0.97 | 1.00 | 1.00 | 0.97 |
|      |    | SG   | 1.00 | 0.97 | 0.95 | 1.00 | 1.00 | 0.94 |
|      |    | None | 1.00 | 0.98 | 0.99 | 0.97 | 0.99 | 0.97 |
| RSVM | BM | 1D   | 1.00 | 1.00 | 1.00 | 1.00 | 1.00 | 1.00 |
|      |    | 2D   | 1.00 | 0.99 | 0.99 | 0.99 | 0.99 | 0.99 |
|      |    | SNV  | 1.00 | 1.00 | 1.00 | 1.00 | 1.00 | 1.00 |
|      |    | SG   | 0.98 | 0.93 | 0.92 | 0.94 | 0.95 | 0.91 |
|      |    | None | 1.00 | 1.00 | 1.00 | 1.00 | 1.00 | 1.00 |
|      |    | 1D   | 1.00 | 0.99 | 0.99 | 1.00 | 1.00 | 0.99 |
|      | CM | 2D   | 1.00 | 1.00 | 1.00 | 1.00 | 1.00 | 1.00 |
|      |    | SNV  | 1.00 | 1.00 | 1.00 | 1.00 | 1.00 | 1.00 |
|      |    | SG   | 1.00 | 0.99 | 0.99 | 1.00 | 1.00 | 0.99 |
|      |    | None | 0.98 | 0.97 | 0.95 | 1.00 | 1.00 | 0.94 |
|      |    | 1D   | 1.00 | 0.97 | 0.95 | 1.00 | 1.00 | 0.94 |
|      |    | 2D   | 0.99 | 0.97 | 0.95 | 1.00 | 1.00 | 0.94 |
|      | GM | SNV  | 0.97 | 0.90 | 0.87 | 0.93 | 0.94 | 0.84 |
|      |    | SG   | 0.98 | 0.97 | 0.95 | 1.00 | 1.00 | 0.94 |

<sup>1</sup>PLS-DA = partial least squares discriminant analysis; LSVM=svmLinear(support vector machine with kernel ); RSVM=svmRadial(support vector machine with radial basis

function kernel ).

<sup>2</sup>BM= buffola milk; GM= goat milk; CM= camel milk.

<sup>31</sup>D = first-order derivative , 2D = second-order derivative , SNV = Standard Normal Variate, and SG = Savitzky-Golsy convolution smoothing.

<sup>4</sup>Acc= Accuracy; Sen=Sensitivity; Spe=Specificity; PPV = positive predicted value; NPV = negative predicted value; AUC = area under the receiver operating characteristic curve.

Table S4 Performance of prediction models obtained in validation set, for the discrimination of pure milk and adulterant (mixed with water)

| Modeling <sup>1</sup> | Milk<br>product <sup>2</sup> | Preprocessing <sup>3</sup> | Validation Metrics <sup>4</sup> |      |      |      |      |      |
|-----------------------|------------------------------|----------------------------|---------------------------------|------|------|------|------|------|
|                       |                              |                            | AUC                             | Acc  | Sen  | Spe  | PPV  | NPV  |
| PLSDA                 | BM                           | None                       | 1.00                            | 1.00 | 1.00 | 1.00 | 1.00 | 1.00 |
|                       |                              | 1D                         | 1.00                            | 1.00 | 1.00 | 1.00 | 1.00 | 1.00 |
|                       |                              | 2D                         | 1.00                            | 1.00 | 1.00 | 1.00 | 1.00 | 1.00 |
|                       |                              | SNV                        | 1.00                            | 0.97 | 0.98 | 0.95 | 0.98 | 0.95 |
|                       |                              | SG                         | 1.00                            | 1.00 | 1.00 | 1.00 | 1.00 | 1.00 |
|                       | CM                           | None                       | 1.00                            | 1.00 | 1.00 | 1.00 | 1.00 | 1.00 |
|                       |                              | 1D                         | 1.00                            | 1.00 | 1.00 | 1.00 | 1.00 | 1.00 |
|                       |                              | 2D                         | 1.00                            | 1.00 | 1.00 | 1.00 | 1.00 | 1.00 |
|                       |                              | SNV                        | 1.00                            | 1.00 | 1.00 | 1.00 | 1.00 | 1.00 |
|                       |                              | SG                         | 1.00                            | 1.00 | 1.00 | 1.00 | 1.00 | 1.00 |
|                       | GM                           | None                       | 0.94                            | 0.88 | 0.92 | 0.75 | 0.92 | 0.75 |
|                       |                              | 1D                         | 0.96                            | 0.88 | 0.85 | 1.00 | 1.00 | 0.67 |
|                       |                              | 2D                         | 0.85                            | 0.76 | 0.69 | 1.00 | 1.00 | 0.50 |
|                       |                              | SNV                        | 1.00                            | 0.94 | 0.92 | 1.00 | 1.00 | 0.80 |
|                       |                              | SG                         | 0.94                            | 0.88 | 0.85 | 1.00 | 1.00 | 0.67 |
| LSVM                  | BM                           | None                       | 1.00                            | 0.98 | 0.98 | 0.97 | 0.99 | 0.97 |
|                       |                              | 1D                         | 1.00                            | 0.99 | 0.99 | 1.00 | 1.00 | 0.97 |
|                       |                              | 2D                         | 1.00                            | 0.98 | 0.98 | 0.97 | 0.99 | 0.97 |
|                       |                              | SNV                        | 1.00                            | 0.98 | 0.99 | 0.97 | 0.99 | 0.97 |
|                       |                              | SG                         | 1.00                            | 0.99 | 1.00 | 0.97 | 0.99 | 1.00 |
|                       | CM                           | None                       | 1.00                            | 1.00 | 1.00 | 1.00 | 1.00 | 1.00 |
|                       |                              | 1D                         | 1.00                            | 1.00 | 1.00 | 1.00 | 1.00 | 1.00 |
|                       |                              | 2D                         | 1.00                            | 1.00 | 1.00 | 1.00 | 1.00 | 1.00 |
|                       |                              | SNV                        | 1.00                            | 1.00 | 1.00 | 1.00 | 1.00 | 1.00 |
|                       |                              | SG                         | 1.00                            | 1.00 | 1.00 | 1.00 | 1.00 | 1.00 |
| GM                    | None                         | 1.00                       | 0.94                            | 0.92 | 1.00 | 1.00 | 0.80 |      |
|                       | 1D                           | 1.00                       | 1.00                            | 1.00 | 1.00 | 1.00 | 1.00 |      |

|      |    |           |             |             |             |             |             |             |
|------|----|-----------|-------------|-------------|-------------|-------------|-------------|-------------|
| RSVM | BM | 2D        | 1.00        | 1.00        | 1.00        | 1.00        | 1.00        | 1.00        |
|      |    | SNV       | 0.94        | 0.82        | 0.85        | 0.75        | 0.92        | 0.60        |
|      |    | SG        | 1.00        | 0.94        | 0.92        | 1.00        | 1.00        | 0.80        |
|      |    | None      | 0.99        | 0.94        | 0.95        | 0.92        | 0.96        | 0.89        |
|      |    | <b>1D</b> | <b>1.00</b> | <b>0.98</b> | <b>0.98</b> | <b>0.97</b> | <b>0.99</b> | <b>0.95</b> |
|      |    | 2D        | 0.98        | 0.92        | 0.95        | 0.88        | 0.89        | 0.95        |
|      |    | SNV       | 0.90        | 0.81        | 0.77        | 0.85        | 0.85        | 0.77        |
|      |    | SG        | 0.94        | 0.86        | 0.91        | 0.80        | 0.88        | 0.89        |
|      | CM | None      | 1.00        | 0.87        | 1.00        | 0.65        | 0.83        | 1.00        |
|      |    | 1D        | 1.00        | 1.00        | 1.00        | 1.00        | 1.00        | 1.00        |
|      |    | <b>2D</b> | <b>1.00</b> | <b>1.00</b> | <b>1.00</b> | <b>1.00</b> | <b>1.00</b> | <b>1.00</b> |
|      |    | SNV       | 0.99        | 0.91        | 1.00        | 0.75        | 0.88        | 1.00        |
|      |    | SG        | 1.00        | 0.89        | 1.00        | 0.70        | 0.85        | 1.00        |
|      | GM | None      | 0.96        | 0.88        | 0.85        | 1.00        | 1.00        | 0.67        |
|      |    | <b>1D</b> | <b>1.00</b> | <b>0.94</b> | <b>0.92</b> | <b>1.00</b> | <b>1.00</b> | <b>0.80</b> |
|      |    | 2D        | 1.00        | 0.94        | 0.92        | 1.00        | 1.00        | 0.80        |
|      |    | SNV       | 0.44        | 0.53        | 0.62        | 0.25        | 0.73        | 0.17        |
|      |    | SG        | 0.98        | 0.88        | 0.85        | 1.00        | 1.00        | 0.67        |

<sup>1</sup>PLS-DA = partial least squares discriminant analysis; LSVM=svmLinear(support vector machine with kernel ); RSVM=svmRadial(support vector machine with radial basis function kernel ).

<sup>2</sup>BM= buffola milk; GM= goat milk; CM= camel milk.

<sup>3</sup>1D = first-order derivative , 2D = second-order derivative , SNV = Standard Normal Variate, and SG = Savitzky–Golsy convolution smoothing.

<sup>4</sup>Acc= Accuaracy; Sen=Sensitivity; Spe=Specificity; PPV = positive predicted value; NPV = negative predicted value; AUC = area under the receiver operating characteristic curve.

Table S5 Performance of prediction models obtained in calibration and validation set, for the discrimination of no adulteration, low level adulteration (cow milk adulteration proportion less than 25%) and high level adulteration (cow milk adulteration proportion more than 25%) samples.

| Modeling <sup>1</sup> | Milk product <sup>2</sup> | Preprocessin<br>g <sup>3</sup> | Calibration      |             | Validation       |             |
|-----------------------|---------------------------|--------------------------------|------------------|-------------|------------------|-------------|
|                       |                           |                                | Acc <sup>4</sup> | KAPPA       | Acc <sup>4</sup> | KAPPA       |
| PLSDA                 | BM                        | None                           | 0.98             | 0.96        | 0.88             | 0.81        |
|                       |                           | <b>1D</b>                      | <b>0.97</b>      | <b>0.96</b> | <b>0.91</b>      | <b>0.84</b> |
|                       |                           | 2D                             | 0.98             | 0.96        | 0.91             | 0.84        |
|                       |                           | SNV                            | 0.98             | 0.96        | 0.91             | 0.84        |
|                       |                           | SG                             | 0.96             | 0.93        | 0.89             | 0.82        |
|                       | CM                        | None                           | 0.98             | 0.97        | 1                | 1           |

|      |    |      |      |      |      |      |
|------|----|------|------|------|------|------|
| LSVM | GM | 1D   | 0.99 | 0.98 | 1    | 1    |
|      |    | 2D   | 0.97 | 0.96 | 0.97 | 0.95 |
|      |    | SNV  | 0.95 | 0.93 | 0.97 | 0.95 |
|      |    | SG   | 0.98 | 0.97 | 1    | 1    |
|      |    | None | 0.99 | 0.98 | 0.96 | 0.94 |
|      | BM | 1D   | 0.99 | 0.98 | 0.88 | 0.81 |
|      |    | 2D   | 0.99 | 0.99 | 0.92 | 0.88 |
|      |    | SNV  | 0.99 | 0.98 | 0.88 | 0.81 |
|      |    | SG   | 0.98 | 0.97 | 0.88 | 0.81 |
|      |    | None | 0.98 | 0.97 | 0.93 | 0.88 |
|      | CM | 1D   | 0.99 | 0.98 | 0.94 | 0.90 |
|      |    | 2D   | 0.98 | 0.97 | 0.88 | 0.81 |
|      |    | SNV  | 0.98 | 0.97 | 0.88 | 0.81 |
|      |    | SG   | 0.97 | 0.96 | 0.89 | 0.82 |
|      |    | None | 1.00 | 1.00 | 1.00 | 1.00 |
| RSVM | GM | 1D   | 1.00 | 1.00 | 1.00 | 1.00 |
|      |    | 2D   | 1.00 | 1.00 | 1.00 | 1.00 |
|      |    | SNV  | 1.00 | 1.00 | 1.00 | 1.00 |
|      |    | SG   | 1.00 | 1.00 | 1.00 | 1.00 |
|      |    | None | 0.96 | 0.94 | 1.00 | 1.00 |
|      | BM | 1D   | 1.00 | 1.00 | 0.96 | 0.94 |
|      |    | 2D   | 1.00 | 1.00 | 1.00 | 1.00 |
|      |    | SNV  | 0.98 | 0.97 | 0.96 | 0.94 |
|      |    | SG   | 0.96 | 0.94 | 0.96 | 0.94 |
|      |    | None | 0.92 | 0.87 | 0.79 | 0.64 |
|      | CM | 1D   | 0.96 | 0.93 | 0.77 | 0.62 |
|      |    | 2D   | 0.96 | 0.93 | 0.73 | 0.54 |
|      |    | SNV  | 0.96 | 0.93 | 0.73 | 0.54 |
|      |    | SG   | 0.91 | 0.85 | 0.77 | 0.62 |
|      |    | None | 1.00 | 1.00 | 0.91 | 0.87 |
|      | GM | 1D   | 1.00 | 1.00 | 0.98 | 0.97 |
|      |    | 2D   | 1.00 | 1.00 | 0.98 | 0.97 |
|      |    | SNV  | 1.00 | 1.00 | 0.96 | 0.95 |
|      |    | SG   | 1.00 | 1.00 | 0.93 | 0.89 |
|      |    | None | 0.82 | 0.73 | 0.63 | 0.44 |
|      |    | 1D   | 0.95 | 0.92 | 0.75 | 0.63 |
|      |    | 2D   | 0.99 | 0.98 | 0.92 | 0.88 |
|      |    | SNV  | 0.92 | 0.88 | 0.88 | 0.81 |
|      |    | SG   | 0.83 | 0.75 | 0.63 | 0.44 |

<sup>1</sup>PLS-DA = partial least squares discriminant analysis; LSVM=svmLinear(support vector machine with kernel ); RSVM=svmRadial(support vector machine with radial basis function kernel ).

<sup>2</sup>BM= buffola milk; GM= goat milk; CM= camel milk.

<sup>3</sup>1D = first-order derivative , 2D = second-order derivative , SNV = Standard Normal Variate, and SG = Savitzky–Golsy convolution smoothing.

<sup>4</sup>Acc= Accuracy.

Table S6 Performance of prediction models obtained in calibration and validation set, for the discrimination of no adulteration, low level adulteration (water adulteration proportion less than 25%) and high level adulteration (water adulteration proportion more than 25%) samples.

| Modeling <sup>1</sup> | Milk product <sup>2</sup> | Preprocessin g <sup>3</sup> | Calibration      |             | Validation       |             |
|-----------------------|---------------------------|-----------------------------|------------------|-------------|------------------|-------------|
|                       |                           |                             | Acc <sup>4</sup> | KAPPA       | Acc <sup>4</sup> | KAPPA       |
| PLSDA                 | BM                        | None                        | 0.98             | 0.97        | 0.94             | 0.91        |
|                       |                           | <b>1D</b>                   | <b>0.98</b>      | <b>0.97</b> | <b>0.96</b>      | <b>0.94</b> |
|                       |                           | 2D                          | 0.98             | 0.97        | 0.94             | 0.91        |
|                       |                           | SNV                         | 0.97             | 0.95        | 0.94             | 0.91        |
|                       |                           | SG                          | 0.96             | 0.93        | 0.93             | 0.89        |
|                       | CM                        | None                        | 1                | 1           | 1                | 1           |
|                       |                           | <b>1D</b>                   | <b>1</b>         | <b>1</b>    | <b>1</b>         | <b>1</b>    |
|                       |                           | 2D                          | 1                | 1           | 1                | 1           |
|                       |                           | SNV                         | 1                | 1           | 0.98             | 0.97        |
|                       |                           | SG                          | 1                | 1           | 1                | 1           |
|                       | GM                        | None                        | 0.99             | 0.98        | 0.94             | 0.90        |
|                       |                           | <b>1D</b>                   | <b>1</b>         | <b>1</b>    | <b>0.94</b>      | <b>0.90</b> |
|                       |                           | 2D                          | 1                | 1           | 0.94             | 0.90        |
|                       |                           | SNV                         | 0.99             | 0.98        | 0.75             | 0.58        |
|                       |                           | SG                          | 1.00             | 1.00        | 0.94             | 0.90        |
| LSVM                  | BM                        | None                        | 0.99             | 0.99        | 0.98             | 0.97        |
|                       |                           | <b>1D</b>                   | <b>1.00</b>      | <b>1.00</b> | <b>0.99</b>      | <b>0.99</b> |
|                       |                           | 2D                          | 1.00             | 1.00        | 0.98             | 0.96        |
|                       |                           | SNV                         | 1.00             | 1.00        | 0.98             | 0.96        |
|                       |                           | SG                          | 0.99             | 0.99        | 0.98             | 0.97        |
|                       | CM                        | None                        | 0.99             | 0.98        | 1.00             | 1.00        |
|                       |                           | 1D                          | 0.99             | 0.98        | 1.00             | 1.00        |
|                       |                           | <b>2D</b>                   | <b>1.00</b>      | <b>1.00</b> | <b>1.00</b>      | <b>1.00</b> |
|                       |                           | SNV                         | 1.00             | 1.00        | 0.98             | 0.97        |
|                       |                           | SG                          | 0.99             | 0.98        | 1.00             | 1.00        |
|                       | GM                        | <b>None</b>                 | <b>0.97</b>      | <b>0.96</b> | <b>1.00</b>      | <b>1.00</b> |
|                       |                           | 1D                          | 0.94             | 0.91        | 1.00             | 1.00        |
|                       |                           | <b>2D</b>                   | <b>0.97</b>      | <b>0.96</b> | <b>1.00</b>      | <b>1.00</b> |
|                       |                           | SNV                         | 0.86             | 0.78        | 0.81             | 0.71        |
|                       |                           | SG                          | 0.97             | 0.96        | 0.94             | 0.90        |
| RSVM                  | BM                        | None                        | 0.98             | 0.97        | 0.90             | 0.86        |
|                       |                           | <b>1D</b>                   | <b>1.00</b>      | <b>1.00</b> | <b>0.99</b>      | <b>0.99</b> |



|    |           |             |             |             |             |
|----|-----------|-------------|-------------|-------------|-------------|
| CM | 2D        | 1.00        | 1.00        | 0.98        | 0.96        |
|    | SNV       | 0.99        | 0.98        | 0.79        | 0.68        |
|    | SG        | 0.99        | 0.98        | 0.91        | 0.86        |
|    | None      | 0.99        | 0.98        | 1.00        | 1.00        |
|    | 1D        | 0.99        | 0.98        | 1.00        | 1.00        |
| GM | <b>2D</b> | <b>1.00</b> | <b>1.00</b> | <b>1.00</b> | <b>1.00</b> |
|    | SNV       | 0.99        | 0.99        | 0.93        | 0.89        |
|    | SG        | 0.99        | 0.98        | 1.00        | 1.00        |
|    | None      | 0.94        | 0.91        | 1.00        | 1.00        |
|    | <b>1D</b> | <b>0.96</b> | <b>0.93</b> | <b>1.00</b> | <b>1.00</b> |
|    | 2D        | 0.96        | 0.93        | 0.94        | 0.90        |
|    | SNV       | 0.67        | 0.48        | 0.44        | 0.05        |
|    | SG        | 0.94        | 0.91        | 1.00        | 1.00        |

<sup>1</sup>PLS-DA = partial least squares discriminant analysis; LSVM=svmLinear(support vector machine with kernel ); RSVM=svmRadial(support vector machine with radial basis function kernel ).

<sup>2</sup>BM= buffola milk; GM= goat milk; CM= camel milk.

<sup>3</sup>1D = first-order derivative , 2D = second-order derivative , SNV = Standard Normal Variate, and SG = Savitzky–Golsy convolution smoothing.

<sup>4</sup>Acc= Accuracy.

Table S7 Comparison of the partial least squares (PLS) regression, and 11 modern statistical machine learning algorithm of the Fourier transform infrared spectra for determining the adulterated cow milk level in buffalo milk

| Modeling <sup>1</sup> | Preprocessin <sup>2</sup><br>g <sup>2</sup> | Calibration set <sup>3</sup> |                  |                             |                  | Validation set <sup>3</sup> |                  |                             |                  |
|-----------------------|---------------------------------------------|------------------------------|------------------|-----------------------------|------------------|-----------------------------|------------------|-----------------------------|------------------|
|                       |                                             | RMSE <sub>c</sub>            | MAE <sub>c</sub> | R <sub>c</sub> <sup>2</sup> | RPD <sub>c</sub> | RMSE <sub>v</sub>           | MAE <sub>v</sub> | R <sub>v</sub> <sup>2</sup> | RPD <sub>v</sub> |
| PLSR                  | None                                        | 7.16                         | 5.60             | 0.80                        | 2.24             | 8.00                        | 6.27             | 0.73                        | 1.95             |
|                       | 1D                                          | 6.63                         | 5.21             | 0.83                        | 2.42             | 9.22                        | 6.92             | 0.67                        | 1.69             |
|                       | 2D                                          | 6.66                         | 5.20             | 0.83                        | 2.41             | 8.15                        | 6.37             | 0.73                        | 1.91             |
|                       | <b>SNV</b>                                  | <b>6.53</b>                  | <b>4.89</b>      | <b>0.83</b>                 | <b>2.46</b>      | <b>7.56</b>                 | <b>5.83</b>      | <b>0.76</b>                 | <b>2.06</b>      |
|                       | SG                                          | 7.46                         | 5.85             | 0.78                        | 2.15             | 8.45                        | 6.62             | 0.71                        | 1.84             |
| LSVM                  | None                                        | 7.70                         | 4.98             | 0.81                        | 2.08             | 8.63                        | 6.15             | 0.73                        | 1.80             |
|                       | 1D                                          | 6.80                         | 4.76             | 0.84                        | 2.36             | 9.26                        | 6.46             | 0.65                        | 1.68             |
|                       | 2D                                          | 6.48                         | 4.66             | 0.84                        | 2.48             | 9.02                        | 6.50             | 0.68                        | 1.73             |
|                       | <b>SNV</b>                                  | <b>6.68</b>                  | <b>4.66</b>      | <b>0.84</b>                 | <b>2.40</b>      | <b>7.88</b>                 | <b>5.87</b>      | <b>0.74</b>                 | <b>1.98</b>      |
|                       | SG                                          | 7.96                         | 5.31             | 0.79                        | 2.01             | 8.75                        | 6.35             | 0.71                        | 1.78             |
| RSVM                  | None                                        | 6.11                         | 3.31             | 0.86                        | 2.63             | 8.79                        | 5.69             | 0.70                        | 1.77             |
|                       | 1D                                          | 5.13                         | 2.82             | 0.90                        | 3.13             | 7.62                        | 5.15             | 0.76                        | 2.04             |
|                       | <b>2D</b>                                   | <b>4.60</b>                  | <b>2.51</b>      | <b>0.92</b>                 | <b>3.49</b>      | <b>7.21</b>                 | <b>5.12</b>      | <b>0.79</b>                 | <b>2.16</b>      |
|                       | SNV                                         | 5.45                         | 3.03             | 0.89                        | 2.95             | 8.29                        | 5.64             | 0.72                        | 1.88             |
|                       | SG                                          | 6.33                         | 3.45             | 0.85                        | 2.53             | 8.89                        | 5.74             | 0.69                        | 1.75             |
| SSR                   | None                                        | 9.85                         | 7.39             | 0.64                        | 1.63             | 9.61                        | 7.50             | 0.62                        | 1.62             |

|       |      |             |             |             |             |              |             |             |             |
|-------|------|-------------|-------------|-------------|-------------|--------------|-------------|-------------|-------------|
| PPR   | 1D   | 7.28        | 5.58        | 0.80        | 2.20        | 8.90         | 6.42        | 0.68        | 1.75        |
|       | 2D   | 7.33        | 5.62        | 0.79        | 2.19        | 8.47         | 6.54        | 0.70        | 1.84        |
|       | SNV  | <b>8.33</b> | <b>6.27</b> | <b>0.74</b> | <b>1.93</b> | <b>8.22</b>  | <b>6.38</b> | <b>0.72</b> | <b>1.89</b> |
|       | SG   | 10.26       | 7.68        | 0.61        | 1.56        | 9.97         | 7.77        | 0.59        | 1.56        |
|       | None | <b>2.75</b> | <b>1.23</b> | <b>0.97</b> | <b>5.84</b> | <b>7.37</b>  | <b>3.73</b> | <b>0.77</b> | <b>2.11</b> |
| CART  | 1D   | 2.66        | 1.09        | 0.97        | 6.04        | 7.49         | 3.71        | 0.77        | 2.08        |
|       | 2D   | 2.73        | 1.16        | 0.97        | 5.87        | 8.39         | 4.65        | 0.71        | 1.86        |
|       | SNV  | 2.86        | 1.31        | 0.97        | 5.61        | 7.66         | 4.18        | 0.76        | 2.03        |
|       | SG   | 3.19        | 1.47        | 0.96        | 5.03        | 7.44         | 3.90        | 0.77        | 2.09        |
|       | None | 11.65       | 8.90        | 0.47        | 1.38        | 12.15        | 8.90        | 0.40        | 1.28        |
| BRNN  | 1D   | 7.33        | 4.61        | 0.79        | 2.19        | 12.83        | 7.63        | 0.42        | 1.21        |
|       | 2D   | 7.83        | 4.74        | 0.76        | 2.05        | 13.25        | 8.25        | 0.34        | 1.18        |
|       | SNV  | 8.30        | 4.81        | 0.73        | 1.93        | 13.95        | 8.81        | 0.32        | 1.12        |
|       | SG   | <b>8.21</b> | <b>4.90</b> | <b>0.74</b> | <b>1.95</b> | <b>11.51</b> | <b>6.80</b> | <b>0.49</b> | <b>1.35</b> |
|       | None | 4.79        | 3.15        | 0.91        | 3.35        | 6.15         | 4.11        | 0.84        | 2.53        |
| RR    | 1D   | 4.88        | 3.26        | 0.91        | 3.29        | 6.11         | 4.20        | 0.85        | 2.55        |
|       | 2D   | 5.17        | 3.44        | 0.90        | 3.10        | 6.12         | 4.17        | 0.85        | 2.54        |
|       | SNV  | 4.90        | 3.21        | 0.91        | 3.27        | 6.09         | 4.10        | 0.85        | 2.56        |
|       | SG   | <b>4.94</b> | <b>3.27</b> | <b>0.91</b> | <b>3.25</b> | <b>6.02</b>  | <b>4.09</b> | <b>0.85</b> | <b>2.59</b> |
|       | None | 9.88        | 7.38        | 0.64        | 1.62        | 9.62         | 7.50        | 0.62        | 1.62        |
| EN    | 1D   | 7.42        | 5.65        | 0.79        | 2.16        | 8.58         | 6.50        | 0.70        | 1.81        |
|       | 2D   | 7.29        | 5.59        | 0.80        | 2.20        | 8.39         | 6.53        | 0.71        | 1.86        |
|       | SNV  | <b>8.24</b> | <b>6.23</b> | <b>0.75</b> | <b>1.95</b> | <b>8.28</b>  | <b>6.46</b> | <b>0.71</b> | <b>1.88</b> |
|       | SG   | 10.37       | 7.74        | 0.60        | 1.55        | 10.00        | 7.76        | 0.59        | 1.56        |
|       | None | 6.96        | 5.42        | 0.81        | 2.31        | 7.83         | 6.04        | 0.74        | 1.99        |
| LASSO | 1D   | 6.40        | 5.02        | 0.84        | 2.51        | 8.79         | 6.48        | 0.69        | 1.77        |
|       | 2D   | 6.28        | 4.89        | 0.85        | 2.56        | 8.05         | 6.13        | 0.74        | 1.93        |
|       | SNV  | <b>6.41</b> | <b>4.90</b> | <b>0.84</b> | <b>2.50</b> | <b>7.45</b>  | <b>5.69</b> | <b>0.77</b> | <b>2.09</b> |
|       | SG   | 7.18        | 5.63        | 0.80        | 2.24        | 8.15         | 6.27        | 0.72        | 1.91        |
|       | None | 6.41        | 5.07        | 0.84        | 2.50        | 7.72         | 6.04        | 0.75        | 2.02        |
| RF    | 1D   | 6.41        | 5.03        | 0.84        | 2.50        | 8.75         | 6.47        | 0.69        | 1.78        |
|       | 2D   | 6.21        | 4.83        | 0.85        | 2.58        | 8.08         | 6.16        | 0.73        | 1.93        |
|       | SNV  | <b>6.32</b> | <b>4.83</b> | <b>0.84</b> | <b>2.54</b> | <b>7.36</b>  | <b>5.63</b> | <b>0.77</b> | <b>2.12</b> |
|       | SG   | 7.29        | 5.69        | 0.79        | 2.20        | 8.12         | 6.28        | 0.73        | 1.92        |
|       | None | 4.47        | 2.78        | 0.93        | 3.59        | 9.38         | 6.24        | 0.63        | 1.66        |
| GBM   | 1D   | 4.15        | 2.63        | 0.95        | 3.87        | 8.83         | 6.11        | 0.68        | 1.76        |
|       | 2D   | <b>3.77</b> | <b>2.35</b> | <b>0.96</b> | <b>4.25</b> | <b>8.25</b>  | <b>5.70</b> | <b>0.72</b> | <b>1.89</b> |
|       | SNV  | 4.79        | 3.12        | 0.93        | 3.35        | 10.62        | 7.22        | 0.53        | 1.47        |
|       | SG   | 4.51        | 2.77        | 0.93        | 3.56        | 9.26         | 6.14        | 0.64        | 1.68        |
|       | None | 4.88        | 3.08        | 0.91        | 3.29        | 9.24         | 6.20        | 0.65        | 1.68        |
|       | 1D   | <b>4.15</b> | <b>2.82</b> | <b>0.93</b> | <b>3.87</b> | <b>8.81</b>  | <b>6.01</b> | <b>0.70</b> | <b>1.77</b> |
|       | 2D   | 4.22        | 2.69        | 0.93        | 3.80        | 10.57        | 7.27        | 0.55        | 1.47        |
|       | SNV  | 4.22        | 2.69        | 0.93        | 3.80        | 10.57        | 7.27        | 0.55        | 1.47        |
|       | SG   | 5.59        | 3.72        | 0.88        | 2.87        | 9.62         | 6.69        | 0.62        | 1.62        |

|      |           |             |             |             |             |             |             |             |             |
|------|-----------|-------------|-------------|-------------|-------------|-------------|-------------|-------------|-------------|
| PCA+ | None      | 6.00        | 4.01        | 0.86        | 2.67        | 10.17       | 6.55        | 0.63        | 1.53        |
| BRNN | <b>1D</b> | <b>5.74</b> | <b>3.88</b> | <b>0.87</b> | <b>2.80</b> | <b>5.42</b> | <b>3.65</b> | <b>0.88</b> | <b>2.87</b> |
|      | 2D        | 5.75        | 3.77        | 0.87        | 2.79        | 6.47        | 4.38        | 0.83        | 2.41        |
|      | SNV       | 6.48        | 4.14        | 0.84        | 2.48        | 7.20        | 4.52        | 0.79        | 2.16        |
|      | SG        | 7.29        | 5.07        | 0.79        | 2.20        | 8.37        | 5.84        | 0.74        | 1.86        |

<sup>1</sup>PLSR=Partial least squares regression, LSVM=svmLinear(support vector machine with kernel ), RSVM=svmRadial(support vector machine with radial basis function kernel ), SSR= Spike and Slab Regression, PPR= Projection Pursuit Regression, CART= Classification and Regression Tree, BRNN=Bayesian Regularized Neural Networks, RR= Ridge Regression, EN= Elastic net Regression, LASSO= Least Absolute Shrinkage and Selection Operator; RF= Random Forest, and GBM= Gradient Boosting Machine.

<sup>2</sup>1D = first-order derivative , 2D = second-order derivative , SNV = Standard Normal Variate, and SG = Savitzky–Golay convolution smoothing.

<sup>3</sup>RMSE= the Root Mean Square Error, MAE= the Mean Absolute Error, R<sup>2</sup>= the coefficient of determination, and RPD= the ratio performance deviation.

Table S8 Comparison of the partial least squares (PLS) regression, and 11 modern statistical machine learning algorithm of the Fourier transform infrared spectra for determining the adulterated water level in buffalo milk

| Modeling <sup>1</sup> | Preprocessin<br>g <sup>2</sup> | Calibration set <sup>3</sup> |             |                 |              | Validation set <sup>3</sup> |             |                 |             |
|-----------------------|--------------------------------|------------------------------|-------------|-----------------|--------------|-----------------------------|-------------|-----------------|-------------|
|                       |                                | RMSEC                        | MAEc        | Rc <sup>2</sup> | RPDc         | RMSEV                       | MAEv        | Rv <sup>2</sup> | RPDv        |
| PLSR                  | <b>None</b>                    | <b>2.06</b>                  | <b>1.31</b> | <b>0.99</b>     | <b>9.19</b>  | <b>2.25</b>                 | <b>1.50</b> | <b>0.99</b>     | <b>8.39</b> |
|                       | 1D                             | 2.17                         | 1.41        | 0.99            | 8.72         | 2.32                        | 1.64        | 0.99            | 8.15        |
|                       | 2D                             | 2.20                         | 1.45        | 0.99            | 8.61         | 2.50                        | 1.73        | 0.98            | 7.56        |
|                       | SNV                            | 2.66                         | 1.94        | 0.98            | 7.13         | 3.02                        | 2.22        | 0.97            | 6.25        |
|                       | SG                             | 2.13                         | 1.37        | 0.99            | 8.90         | 2.33                        | 1.57        | 0.99            | 8.12        |
| LSVM                  | None                           | 2.11                         | 1.32        | 0.99            | 8.96         | 2.23                        | 1.48        | 0.99            | 8.48        |
|                       | <b>1D</b>                      | <b>2.09</b>                  | <b>1.32</b> | <b>0.99</b>     | <b>9.08</b>  | <b>2.20</b>                 | <b>1.48</b> | <b>0.99</b>     | <b>8.58</b> |
|                       | 2D                             | 2.14                         | 1.36        | 0.99            | 8.85         | 2.41                        | 1.64        | 0.98            | 7.83        |
|                       | SNV                            | 2.26                         | 1.57        | 0.99            | 8.36         | 2.52                        | 1.76        | 0.98            | 7.50        |
|                       | SG                             | 2.19                         | 1.37        | 0.99            | 8.64         | 2.25                        | 1.49        | 0.99            | 8.41        |
| RSVM                  | None                           | 2.16                         | 1.53        | 0.99            | 8.77         | 2.94                        | 2.01        | 0.98            | 6.43        |
|                       | <b>1D</b>                      | <b>1.66</b>                  | <b>1.29</b> | <b>0.99</b>     | <b>11.40</b> | <b>2.76</b>                 | <b>1.86</b> | <b>0.98</b>     | <b>6.85</b> |
|                       | 2D                             | 1.55                         | 1.25        | 0.99            | 12.22        | 3.00                        | 2.06        | 0.98            | 6.31        |
|                       | SNV                            | 1.94                         | 1.59        | 0.99            | 9.74         | 6.51                        | 4.41        | 0.89            | 2.90        |
|                       | SG                             | 2.16                         | 1.52        | 0.99            | 8.75         | 2.95                        | 2.00        | 0.98            | 6.40        |
| SSR                   | None                           | 3.00                         | 1.99        | 0.97            | 6.31         | 3.01                        | 2.15        | 0.98            | 6.27        |
|                       | <b>1D</b>                      | <b>2.39</b>                  | <b>1.50</b> | <b>0.98</b>     | <b>7.91</b>  | <b>2.47</b>                 | <b>1.73</b> | <b>0.98</b>     | <b>7.64</b> |
|                       | 2D                             | 2.35                         | 1.49        | 0.98            | 8.06         | 2.57                        | 1.73        | 0.98            | 7.34        |
|                       | SNV                            | 3.54                         | 2.56        | 0.96            | 5.34         | 3.91                        | 2.90        | 0.96            | 4.84        |
|                       | SG                             | 3.04                         | 2.05        | 0.97            | 6.23         | 2.92                        | 2.08        | 0.98            | 6.46        |
| PPR                   | None                           | 0.78                         | 0.34        | 1.00            | 24.19        | 2.35                        | 0.95        | 0.99            | 8.03        |
|                       | 1D                             | 0.74                         | 0.32        | 1.00            | 25.58        | 2.44                        | 0.96        | 0.98            | 7.74        |

|         |            |             |             |             |               |             |             |             |              |
|---------|------------|-------------|-------------|-------------|---------------|-------------|-------------|-------------|--------------|
|         | 2D         | 0.74        | 0.32        | 1.00        | 25.49         | 2.39        | 0.97        | 0.98        | 7.92         |
|         | SNV        | 0.66        | 0.29        | 1.00        | 28.56         | 2.40        | 0.83        | 0.98        | 7.87         |
|         | <b>SG</b>  | <b>1.03</b> | <b>0.30</b> | <b>1.00</b> | <b>18.30</b>  | <b>1.67</b> | <b>0.59</b> | <b>0.99</b> | <b>11.30</b> |
| CART    | None       | 2.36        | 0.78        | 0.98        | 8.03          | 4.20        | 1.39        | 0.95        | 4.49         |
|         | 1D         | 1.85        | 0.57        | 0.99        | 10.25         | 3.69        | 1.28        | 0.96        | 5.12         |
|         | <b>2D</b>  | <b>1.91</b> | <b>0.57</b> | <b>0.99</b> | <b>9.90</b>   | <b>3.23</b> | <b>1.09</b> | <b>0.97</b> | <b>5.86</b>  |
|         | SNV        | 9.10        | 6.19        | 0.77        | 2.08          | 14.69       | 10.78       | 0.42        | 1.29         |
|         | SG         | 2.33        | 0.76        | 0.98        | 8.11          | 4.18        | 1.39        | 0.95        | 4.52         |
| BRNN    | None       | 1.75        | 1.10        | 0.99        | 10.85         | 2.15        | 1.37        | 0.99        | 8.78         |
|         | 1D         | 1.73        | 1.10        | 0.99        | 10.92         | 2.14        | 1.38        | 0.99        | 8.82         |
|         | 2D         | 1.10        | 0.78        | 1.00        | 17.27         | 3.01        | 1.55        | 0.98        | 6.28         |
|         | SNV        | 1.03        | 0.81        | 1.00        | 18.44         | 2.30        | 1.52        | 0.99        | 8.20         |
|         | <b>SG</b>  | <b>1.80</b> | <b>1.15</b> | <b>0.99</b> | <b>10.52</b>  | <b>2.12</b> | <b>1.32</b> | <b>0.99</b> | <b>8.92</b>  |
| RR      | None       | 3.29        | 2.30        | 0.97        | 5.75          | 3.17        | 2.33        | 0.97        | 5.96         |
|         | <b>1D</b>  | <b>2.61</b> | <b>1.71</b> | <b>0.98</b> | <b>7.25</b>   | <b>2.58</b> | <b>1.86</b> | <b>0.98</b> | <b>7.33</b>  |
|         | 2D         | 2.55        | 1.63        | 0.98        | 7.43          | 2.71        | 1.84        | 0.98        | 6.96         |
|         | SNV        | 4.45        | 3.21        | 0.95        | 4.25          | 4.93        | 3.81        | 0.94        | 3.84         |
|         | SG         | 3.39        | 2.40        | 0.97        | 5.59          | 3.18        | 2.37        | 0.97        | 5.93         |
| EN      | None       | 2.52        | 1.66        | 0.98        | 7.53          | 2.62        | 1.79        | 0.98        | 7.22         |
|         | <b>1D</b>  | <b>2.24</b> | <b>1.43</b> | <b>0.99</b> | <b>8.46</b>   | <b>2.37</b> | <b>1.66</b> | <b>0.98</b> | <b>7.97</b>  |
|         | 2D         | 2.26        | 1.44        | 0.99        | 8.36          | 2.50        | 1.69        | 0.98        | 7.55         |
|         | SNV        | 2.47        | 1.80        | 0.98        | 7.68          | 2.91        | 2.07        | 0.98        | 6.50         |
|         | SG         | 2.47        | 1.61        | 0.98        | 7.65          | 2.57        | 1.76        | 0.98        | 7.35         |
| LASSO   | None       | 3.32        | 2.29        | 0.97        | 5.71          | 3.30        | 2.36        | 0.97        | 5.73         |
|         | <b>1D</b>  | <b>2.43</b> | <b>1.54</b> | <b>0.98</b> | <b>7.79</b>   | <b>2.50</b> | <b>1.76</b> | <b>0.98</b> | <b>7.57</b>  |
|         | 2D         | 2.30        | 1.47        | 0.99        | 8.23          | 2.55        | 1.72        | 0.98        | 7.40         |
|         | SNV        | 2.48        | 1.81        | 0.98        | 7.64          | 2.92        | 2.09        | 0.98        | 6.46         |
|         | SG         | 2.90        | 1.95        | 0.98        | 6.53          | 2.80        | 2.01        | 0.98        | 6.76         |
| RF      | None       | 1.15        | 0.51        | 1.00        | 16.45         | 2.70        | 1.28        | 0.98        | 6.99         |
|         | 1D         | 1.05        | 0.45        | 1.00        | 18.09         | 2.76        | 1.36        | 0.98        | 6.84         |
|         | <b>2D</b>  | <b>1.10</b> | <b>0.52</b> | <b>1.00</b> | <b>17.26</b>  | <b>2.64</b> | <b>1.41</b> | <b>0.98</b> | <b>7.17</b>  |
|         | SNV        | 3.97        | 2.90        | 0.97        | 4.78          | 10.83       | 7.90        | 0.71        | 1.74         |
|         | SG         | 1.25        | 0.54        | 1.00        | 15.09         | 2.73        | 1.24        | 0.98        | 6.92         |
| GBM     | None       | 0.17        | 0.09        | 1.00        | 114.33        | 3.15        | 1.58        | 0.97        | 6.01         |
|         | <b>1D</b>  | <b>0.18</b> | <b>0.07</b> | <b>1.00</b> | <b>104.93</b> | <b>2.51</b> | <b>1.35</b> | <b>0.98</b> | <b>7.53</b>  |
|         | 2D         | 0.35        | 0.15        | 1.00        | 53.94         | 2.57        | 1.42        | 0.98        | 7.35         |
|         | <b>SNV</b> | <b>0.69</b> | <b>0.54</b> | <b>1.00</b> | <b>27.31</b>  | <b>7.57</b> | <b>5.21</b> | <b>0.85</b> | <b>2.50</b>  |
|         | SG         | 0.16        | 0.08        | 1.00        | 116.99        | 3.27        | 1.50        | 0.97        | 5.78         |
| PCA+PPR | None       | 2.55        | 1.33        | 0.98        | 7.42          | 2.73        | 1.57        | 0.98        | 6.91         |
|         | <b>1D</b>  | <b>1.23</b> | <b>0.44</b> | <b>1.00</b> | <b>15.40</b>  | <b>1.70</b> | <b>0.68</b> | <b>0.99</b> | <b>11.10</b> |
|         | 2D         | 1.38        | 0.57        | 0.99        | 13.68         | 2.08        | 0.91        | 0.99        | 9.09         |
|         | <b>SNV</b> | <b>2.66</b> | <b>1.95</b> | <b>0.98</b> | <b>7.12</b>   | <b>2.94</b> | <b>2.17</b> | <b>0.98</b> | <b>6.43</b>  |
|         | SG         | 2.47        | 1.25        | 0.98        | 7.65          | 2.78        | 1.61        | 0.98        | 6.79         |

<sup>1</sup>PLSR=Partial least squares regression, LSVM=svmLinear(support vector machine

with kernel  $\gamma$ ), RSVM=svmRadial(support vector machine with radial basis function kernel  $\gamma$ ), SSR= Spike and Slab Regression, PPR= Projection Pursuit Regression, CART= Classification and Regression Tree, BRNN=Bayesian Regularized Neural Networks, RR= Ridge Regression, EN= Elastic net Regression, LASSO= Least Absolute Shrinkage and Selection Operator; RF= Random Forest, and GBM= Gradient Boosting Machine.

<sup>2</sup>1D = first-order derivative , 2D = second-order derivative , SNV = Standard Normal Variate, and SG = Savitzky–Golay convolution smoothing.

<sup>3</sup>RMSE= the Root Mean Square Error, MAE= the Mean Absolute Error,  $R^2$ = the coefficient of determination, and RPD= the ratio performance deviation.
